# Supplementary figures and images for: Nucleated dewetting in supported ultra-thin liquid films with hydrodynamic slip
Source: Royal Society of Chemistry journal article supplement (doi:10.1039/c7sm00869d), 2017-01-01

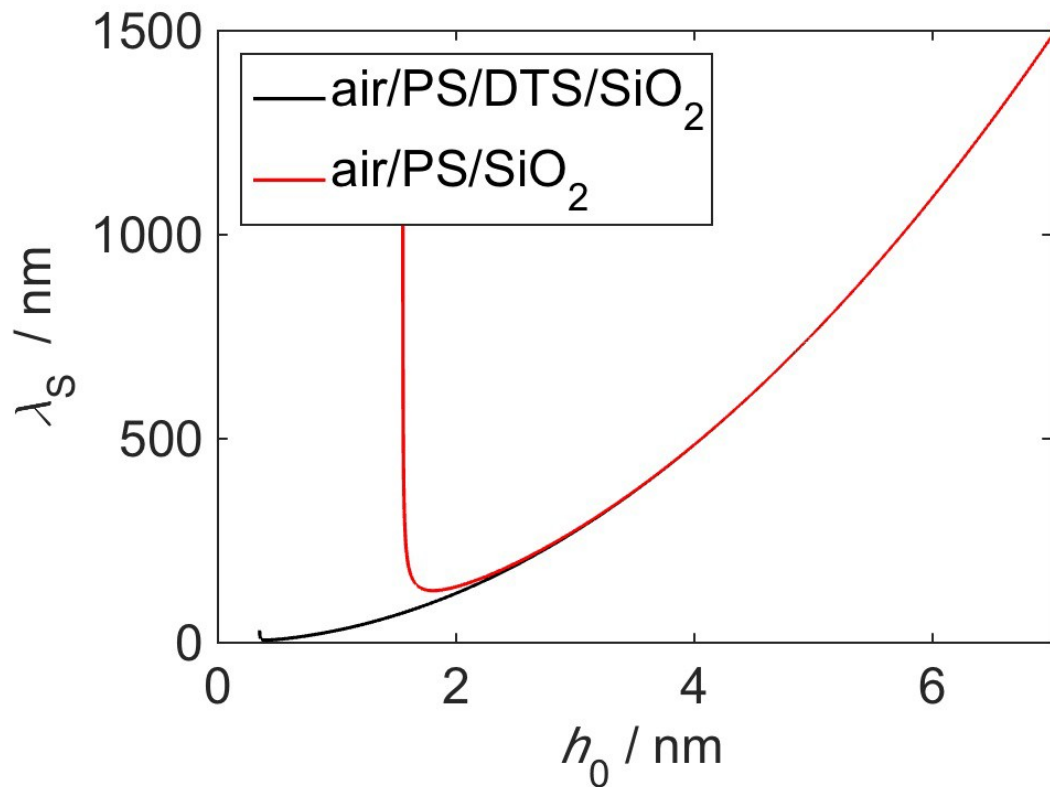

Supplement: c7sm00869d2.pdf [file c7sm00869d2.pdf]

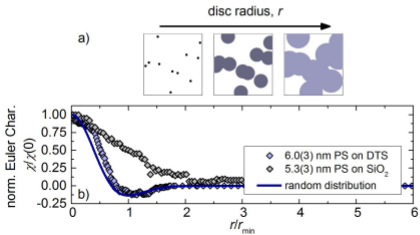

Supplement: c7sm00869d3.pdf [file c7sm00869d3.pdf]

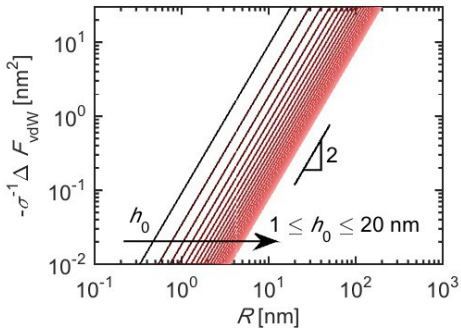

Supplement: c7sm00869d5.pdf [file c7sm00869d5.pdf]

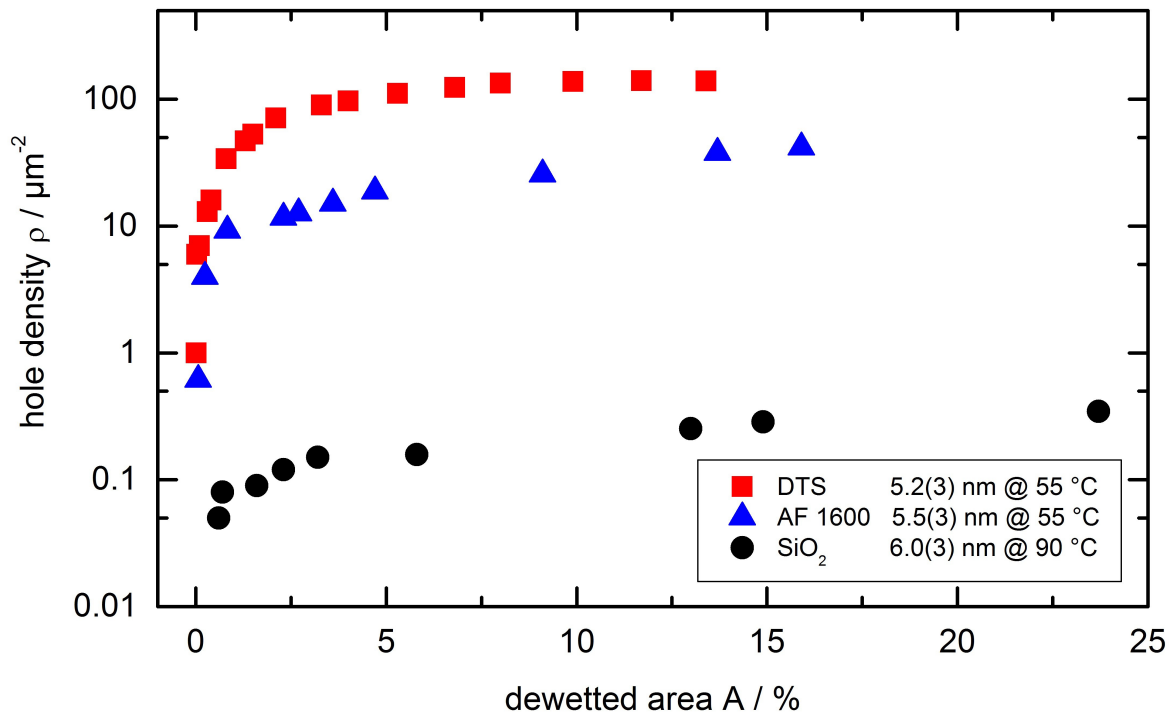

Supplement: c7sm00869d8.pdf [file c7sm00869d8.pdf]
